# Supplementary material for: From single atoms to self-assembled quantum single-atomic nanowires: noble metal atoms on black phosphorene monolayers
Source: Royal Society of Chemistry journal article supplement (doi:10.1039/c6cp08230k), 2017-01-01
Supplement: c6cp08230k1.pdf [file c6cp08230k1.pdf]

Electronic supplementary information for

**From Single Atom to Self-Assembled Quantum Single-Atomic Nanowire:  
Noble Metal Atoms on Black Phosphorene Monolayer**

X. J. Zhao,<sup>a</sup> Wen-Wen Shan,<sup>b</sup> Hao He,<sup>a</sup> Xinlian Xue,<sup>a</sup> Z. X. Guo<sup>c,a</sup> and S. F. Li<sup>\*a</sup>

<sup>a</sup>*International Laboratory for Quantum Functional Materials of Henan, School of Physics and Engineering, Zhengzhou University, Zhengzhou, Henan 450001, China*

<sup>b</sup>*North China University of Water Resources and Electric Power, Zhengzhou, 450011, China*

<sup>c</sup>*Department of Chemistry, University College London, London WC1H 0AJ, UK*

**This file includes:**

Supplementary Texts S1-S6

Supplementary Figures S1-S6

**Supplementary Texts:**

S1: The relative stabilities between the two most stable stacking motifs

S2: The most stable structures of Pd<sub>n</sub> SMAWs (*n*=8-15)

S3: MD simulations for some representative configurations

S4: Geometric and electronic structures of the infinite Pd SMAW on BP

S5: The magic characteristics of Pt<sub>n</sub> SMAWs

S6: The semiconducting characteristics of Pd SMAWs

## S1: The relative stabilities between the two most stable stacking motifs

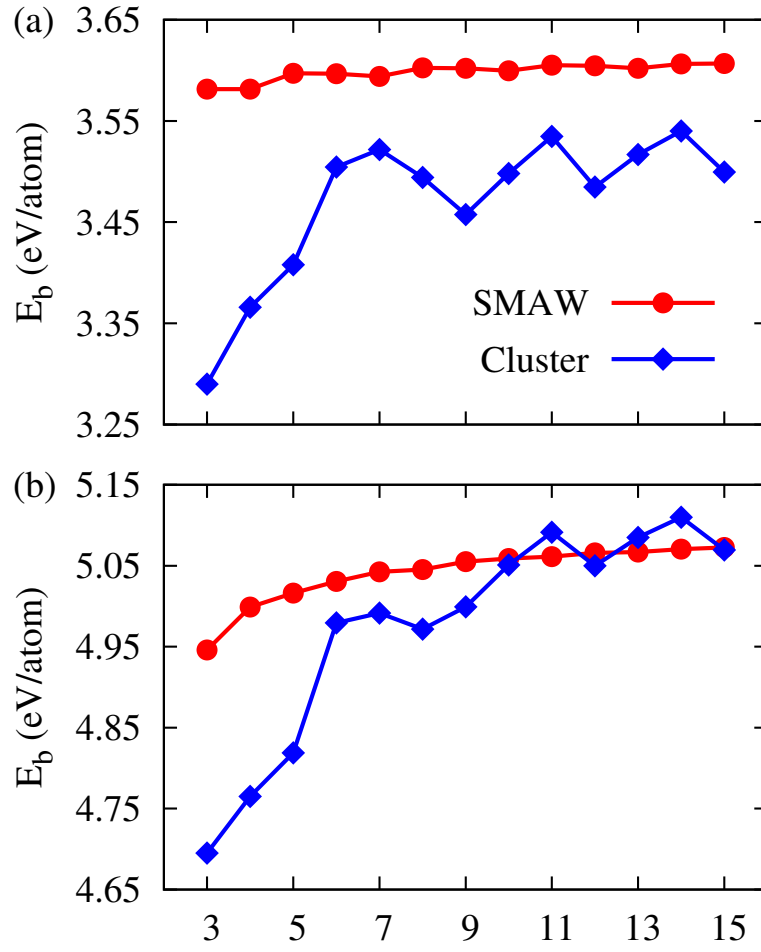

**Fig. S1** Average binding energy per atom  $E_b(n)$  for (a)  $Pd_n$  and (b)  $Pt_n$  ( $n=3-15$ ) between the SMAW and cluster growth models. Here,  $E_b(n) = -[E(TM/BP) - E(BP) - n \times E(TM_{atom})]/n$ .

## S2: The most stable structures of Pd<sub>n</sub> SMAWs ( $n=8-15$ )

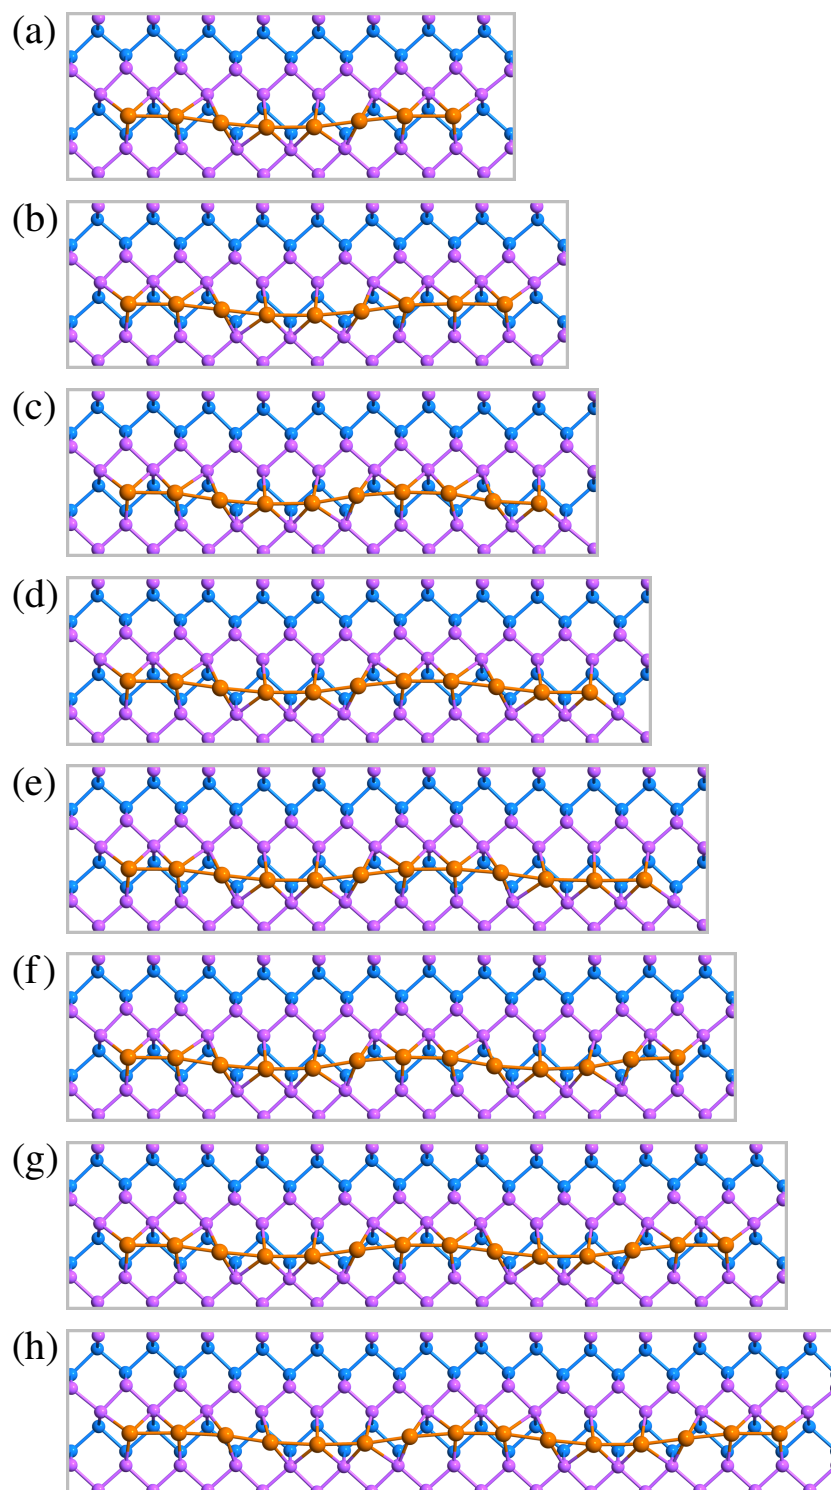

**Fig. S2** The most stable structures of Pd<sub>n</sub> SMAWs, where (a)-(h) corresponding to  $n=8-15$ , respectively.

### S3: MD simulations for some representative configurations

The structural stability of the  $\text{Pd}_n$  and  $\text{Pt}_n$  SMAWs were examined by MD simulations at room temperature. In Fig. S3, we present the structural snapshots of every 1000 simulation steps (1fs/step) for  $\text{Pd}_8$  and  $\text{Pd}_5$  SMAWs. One can see that during the whole MD simulation time, the profiles of the  $\text{Pd}_n$  SMAWs are well-kept, and intriguingly, we observed that the whole SMAWs can slowly drift along the trough of the BP substrates.

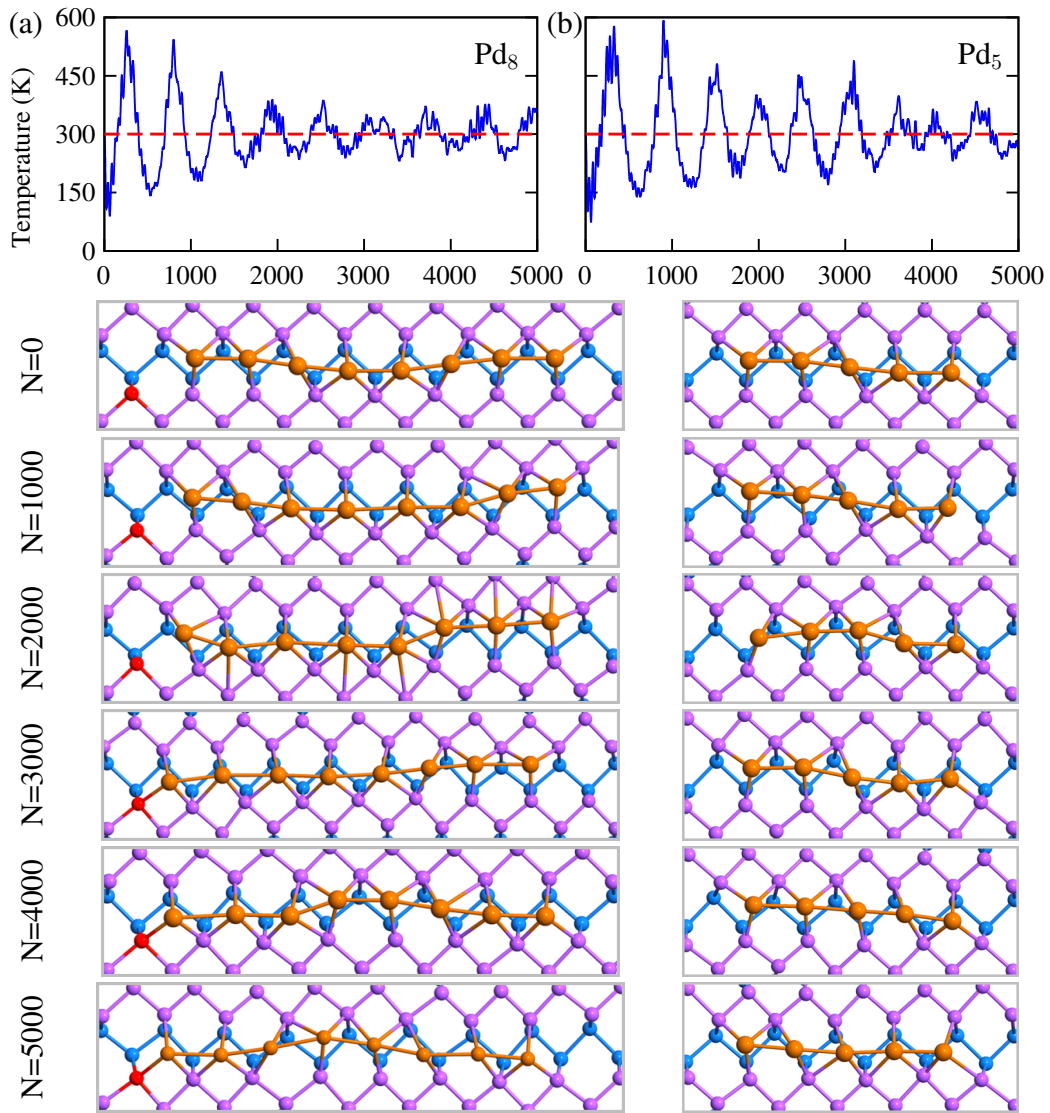

**Fig. S3** Molecular Dynamics simulations of (a)  $\text{Pd}_8$  and (b)  $\text{Pd}_5$  SMAWs.  $N=0, 1000, \dots, 5000$  corresponding to the structural snapshot in every 1000 MD steps. One P atom in BP substrate of  $\text{Pd}_8$  SMAW was marked to red to locate the  $\text{Pd}_8$  atomic chain.

# **S4: Geometric and electronic structures of the infinite Pd SMAW on BP**

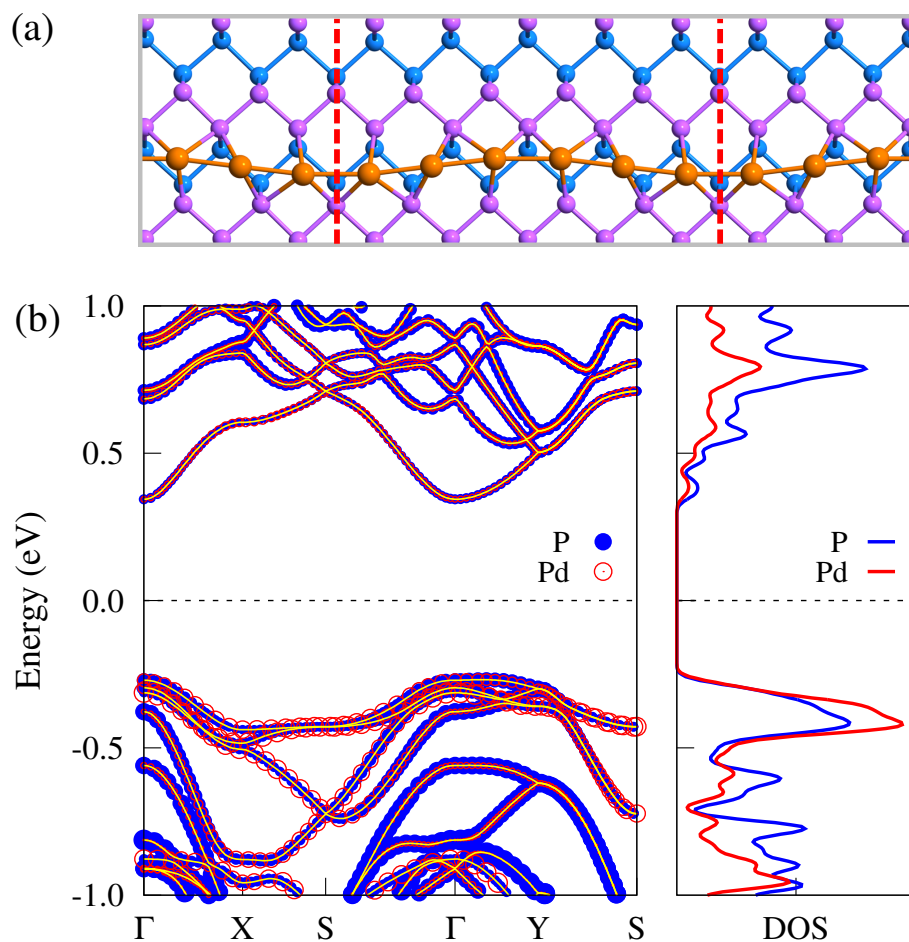

**Fig. S4** Geometric and electronic structures of the infinite Pd SMAW on BP. (a) the optimized infinite Pd SMAW on BP with one periodic marked by the red dash line; (b) local projected band structure (left panel) along the high symmetric path and its corresponding density of states (right panel).

## S5: The magic characteristics of $Pt_n$ SMAWs

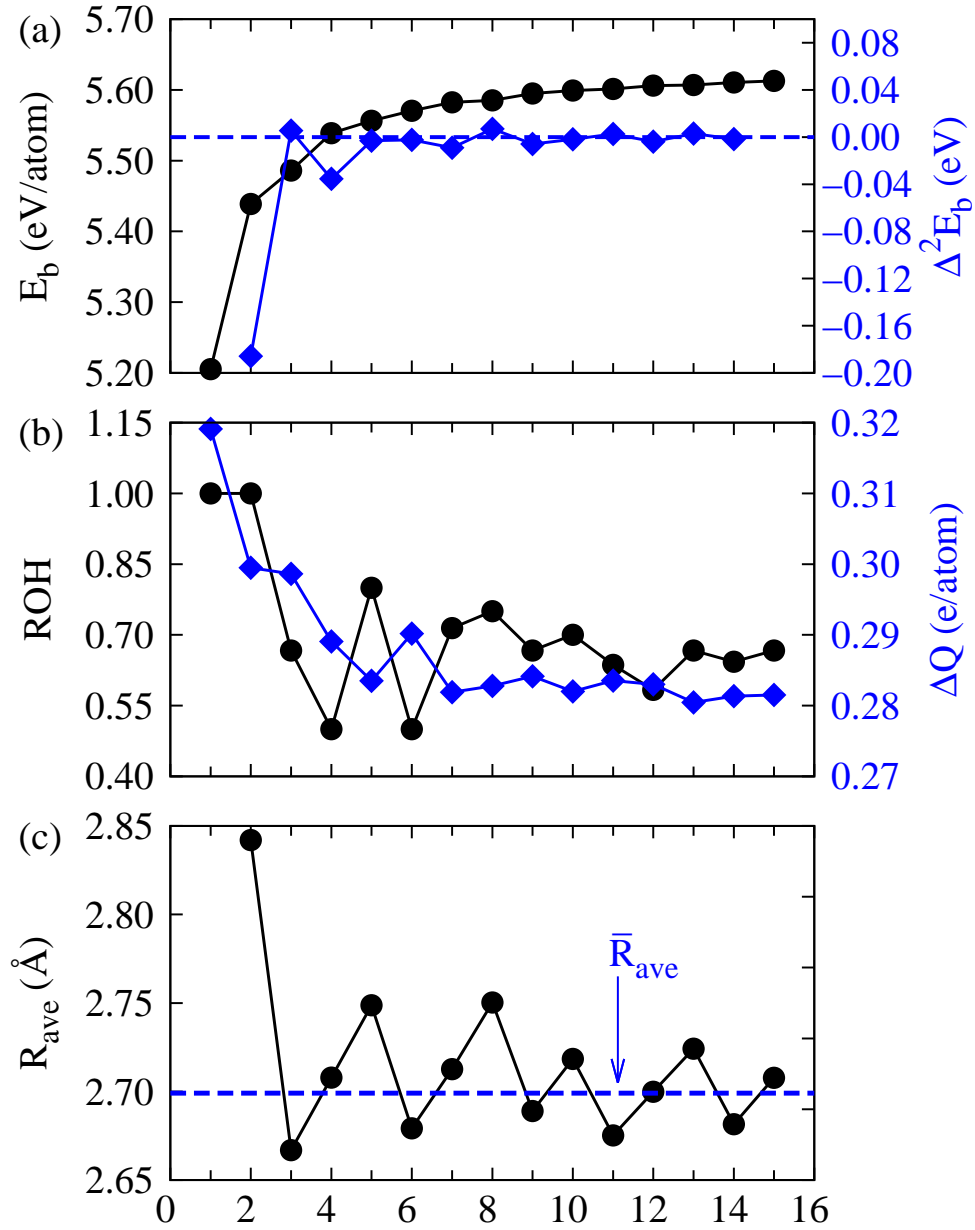

**Fig. S5** (a) Average binding energy per atom  $E_b(n)$ , represented by the black circles; and its second-order difference represented by the blue diamonds,  $\Delta^2 E_b(n) = E_b(n+1) + E_b(n-1) - 2E_b(n)$  for Pt SMAWs. (b) The ratio of the hollow sites (ROH, represented by the black circles) on which the Pt atoms in the SMAWs occupy, and the average charge transfer  $\Delta Q$  (e/atom) from the BP substrate to the Pt SMAWs per Pt atom. (c) Averaged nearest neighboring Pt-Pt bond length.

## S6: The semiconducting characteristics of Pd SMAWs

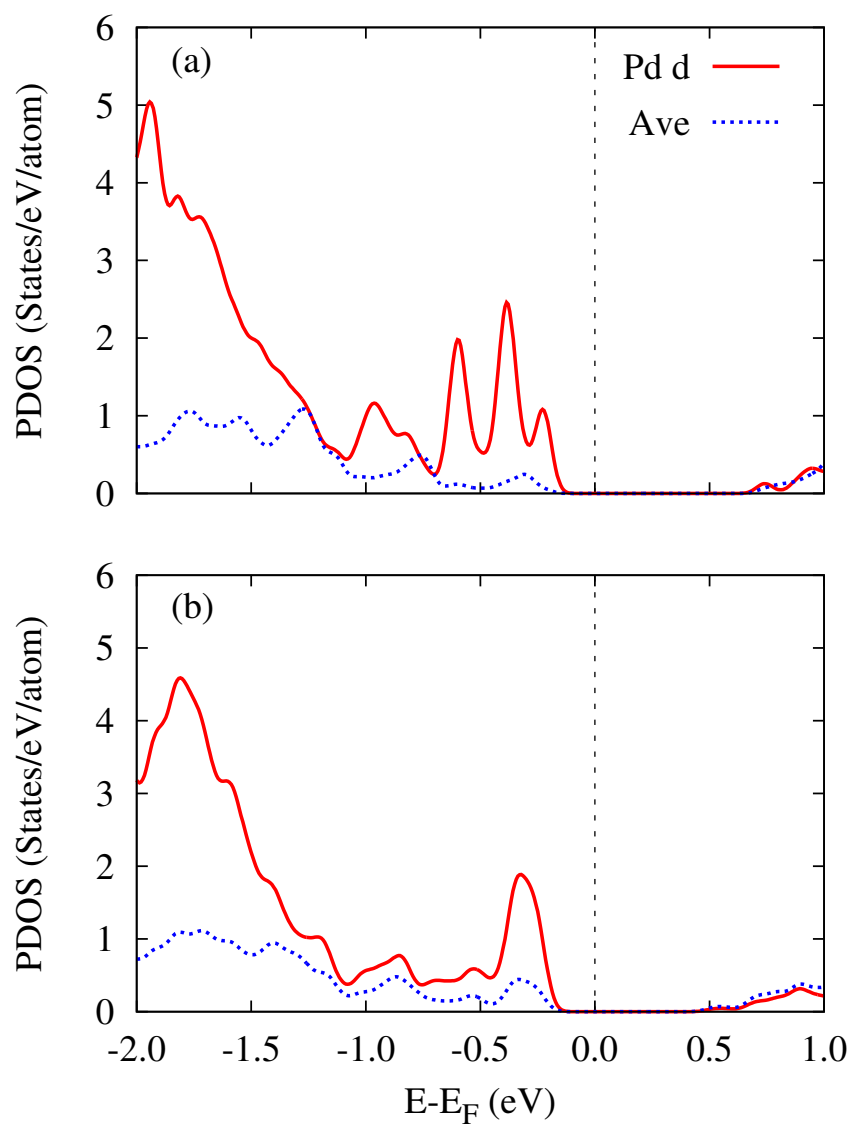

**Fig. S6** Local projected density of states (PDOS) of (a) Pd<sub>2</sub>/BP and (b) Pd<sub>15</sub>/BP complexes. Significantly, these Pd<sub>n</sub>/BP heterostructures studied in the present work exhibit semiconducting properties with the Pd atoms contributing high DOS by the valence band maximum.
